# Supplementary material for: Symptoms of depression are associated with reduced leisure-time physical activity in adult individuals with type 1 diabetes
Source: PubMed Central journal article supplement (PMC8413160; doi:10.1007/s00592-021-01718-6), 2021-05-19
Supplement: 592_2021_1718_MOESM1_ESM.pdf [file 592_2021_1718_MOESM1_ESM.pdf]

**Symptoms of depression are associated with reduced leisure-time physical activity  
in adult individuals with type 1 diabetes**

Aila J. Ahola<sup>1,2,3</sup>, Heidi Tikkanen-Dolenc<sup>1,2,3</sup>, Carol Forsblom<sup>1,2,3</sup>, Valma Harjutsalo<sup>1,2,3,4</sup>,  
Per-Henrik Groop<sup>1,2,3,5\*</sup>, on behalf of the FinnDiane Study Group

<sup>1</sup> Folkhälsan Institute of Genetics, Folkhälsan Research Center, Helsinki, Finland

<sup>2</sup> Abdominal Center, Nephrology, University of Helsinki and Helsinki University Central  
Hospital, Helsinki, Finland

<sup>3</sup> Research Program for Clinical and Molecular Metabolism, Faculty of Medicine, University  
of Helsinki, Finland

<sup>4</sup> National Institute for Health and Welfare, Helsinki, Finland

<sup>5</sup> Department of Diabetes, Central Clinical School, Monash University, Melbourne, Victoria,  
Australia.

\*Corresponding author: Per-Henrik Groop, Folkhälsan Research Center, Biomedicum  
Helsinki C318b, PO Box 63, FI-00014 University of Helsinki, Finland. Tel +358 500 430  
436. Email: per-henrik.groop@helsinki.fi

**Supplementary Table 1** Associations between antidepressant agent purchases and leisure-time physical activity

|                                                 | B     | 95% CI         | P     |
|-------------------------------------------------|-------|----------------|-------|
| LTPA, METh/week                                 | 0.089 | -5.954 – 6.131 | 0.977 |
| Activity level, inactive as reference           |       |                |       |
| Moderately active                               | 0.608 | 0.375 – 0.989  | 0.045 |
| Active                                          | 0.703 | 0.365 – 1.356  | 0.293 |
| Frequency of LTPA, <1 session/week as reference |       |                |       |
| 1-2 sessions/week                               | 0.741 | 0.408 – 1.345  | 0.324 |
| >2 sessions/week                                | 0.689 | 0.414 – 1.145  | 0.150 |
| Intensity of LTPA, low intensity as reference   |       |                |       |
| Moderate intensity                              | 0.511 | 0.328 – 0.796  | 0.003 |
| High intensity                                  | 0.360 | 0.180 – 0.719  | 0.004 |
| Duration of LTPA session, <30 min as reference  |       |                |       |
| 31-60 minutes                                   | 0.517 | 0.297 – 0.900  | 0.020 |
| >60 minutes                                     | 0.440 | 0.234 – 0.825  | 0.010 |

Association between antidepressant agent purchases and leisure-time physical activity (in METh) was investigated with generalized linear regression, in all other analyses multinomial logistic regression analysis was used. All models are adjusted for age, sex, body mass index, estimated glomerular filtration rate, and current smoking. In these analyses, antidepressant agent purchases (classes N06A and N06CA in The Anatomical Therapeutic Chemical Classification System with Defined Daily Doses) within a year from the study visit were considered. CI, Confidence Interval; METh, metabolic equivalent of task hours, LTPA, leisure-time physical activity.

## Supplementary information of The Finnish Diabetic Nephropathy Study Centers

|                                                                                      |                                                                                                                                                                                                           |
|--------------------------------------------------------------------------------------|-----------------------------------------------------------------------------------------------------------------------------------------------------------------------------------------------------------|
| Anjalankoski Health Center                                                           | S.Koivula, T.Uggeldahl                                                                                                                                                                                    |
| Central Finland Central Hospital, Jyväskylä                                          | T.Forslund, A.Halonen, A.Koistinen, P.Koskiahio, M.Laukkanen, J.Saltevo, M.Tiihonen                                                                                                                       |
| Central Hospital of Åland Islands, Mariehamn                                         | M.Forsen, H.Granlund, A.-C.Jonsson, B.Nyroos                                                                                                                                                              |
| Central Hospital of Kanta-Häme, Hämeenlinna                                          | P.Kinnunen, A.Orvola, T.Salonen, A.Vähänen                                                                                                                                                                |
| Central Hospital of Kymenlaakso, Kotka                                               | R.Paldanius, M.Riihelä, L.Ryysy                                                                                                                                                                           |
| Central Hospital of Länsi-Pohja, Kemi                                                | H.Laukkanen, P.Nyländen, A.Sademies                                                                                                                                                                       |
| Central Ostrobothnian Hospital District, Kokkola                                     | S.Anderson, B.Asplund, U.Byskata, P.Liedes, M.Kuusela, T.Virkkala                                                                                                                                         |
| City of Espoo Health Center:                                                         |                                                                                                                                                                                                           |
| Espoonlahti                                                                          | A.Nikkola, E.Ritola                                                                                                                                                                                       |
| Tapiola                                                                              | M.Niska, H.Saarinen                                                                                                                                                                                       |
| Samaria                                                                              | E.Oukko-Ruponen, T.Virtanen                                                                                                                                                                               |
| Viherlaakso                                                                          | A.Lyytinen                                                                                                                                                                                                |
| City of Helsinki Health Center:                                                      |                                                                                                                                                                                                           |
| Puistola                                                                             | H.Kari, T.Simonen                                                                                                                                                                                         |
| Suutarila                                                                            | A.Kaprio, J.Kärkkäinen, B.Rantaeskola                                                                                                                                                                     |
| Töölö                                                                                | P.Kääriäinen, J.Haaga, A-L.Pietiläinen                                                                                                                                                                    |
| City of Hyvinkää Health Center                                                       | S.Klemetti, T.Nyandoto, E.Rontu, S.Satuli-Autere                                                                                                                                                          |
| City of Vantaa Health Center:                                                        |                                                                                                                                                                                                           |
| Korso                                                                                | R.Toivonen, H.Virtanen                                                                                                                                                                                    |
| Länsimäki                                                                            | R.Ahonen, M.Ivaska-Suomela, A.Jauhiainen                                                                                                                                                                  |
| Martinlaakso                                                                         | M.Laine, T.Pellonpää, R.Puranen                                                                                                                                                                           |
| Myyrmäki                                                                             | A.Airas, J.Laakso, K.Rautavaara                                                                                                                                                                           |
| Rekola                                                                               | M.Erola, E.Jatkola                                                                                                                                                                                        |
| Tikkurila                                                                            | R.Lönnblad, A.Malm, J.Mäkelä, E.Rautamo                                                                                                                                                                   |
| Heinola Health Center                                                                | P.Hentunen, J.Lagerstam                                                                                                                                                                                   |
| Helsinki University Central Hospital, Department of Medicine, Division of Nephrology | M.Fedoroff, D.Gordin, O.Heikkilä, K.Hietala, J.Fagerudd, M.Korolainen, L.Kyllönen, J.Kytö, S.Lindh, K.Pettersson-Fernholm, M.Rosengård-Bärlund, A.Sandelin, L.Thorn, J.Tuomikangas, T.Vesisenaho, J.Wadén |
| Herttoniemi Hospital, Helsinki                                                       | V.Sipilä                                                                                                                                                                                                  |
| Hospital of Lounais-Häme, Forssa                                                     | T.Kalliomaäki, J.Koskelainen, R.Nikkanen, N.Savolainen, H.Sulonen, E.Valtonen                                                                                                                             |
| Hyvinkää Hospital                                                                    | L.Norvio, A.Hämäläinen                                                                                                                                                                                    |
| Iisalmi Hospital                                                                     | E.Toivanen                                                                                                                                                                                                |
| Jokilaakso Hospital, Jämsä                                                           | A.Parta, I.Pirttiniemi                                                                                                                                                                                    |
| Jorvi Hospital, Helsinki University Central Hospital                                 | S.Aranko, S.Ervasti, R.Kauppinen-Mäkelin, A.Kuusisto, T.Leppälä, K.Nikkilä, L.Pekkonen                                                                                                                    |
| Jyväskylä Health Center, Kyllö                                                       | K.Nuorva, M.Tiihonen                                                                                                                                                                                      |
| Kainuu Central Hospital, Kajaani                                                     | S.Jokelainen, K.Kananen, M.Karjalainen, P.Kemppainen, A-M.Mankinen,                                                                                                                                       |
| A.Reponen                                                                            | M.Sankari                                                                                                                                                                                                 |
| Kerava Health Center                                                                 | H.Stuckey, P.Suominen                                                                                                                                                                                     |
| Kirkkonummi Health Center                                                            | A.Lappalainen, M.Liimatainen, J.Santaholma                                                                                                                                                                |
| Kivelä Hospital, Helsinki                                                            | A.Aimolahti, E.Huovinen                                                                                                                                                                                   |
| Koskela Hospital, Helsinki                                                           | V.Ilkka, M.Lehtimäki                                                                                                                                                                                      |
| Kotka Health Center                                                                  | E.Pälikkö-Kontinen, A.Vanhanen                                                                                                                                                                            |
| Kouvola Health Center                                                                | E.Koskinen, T.Siitonen                                                                                                                                                                                    |
| Kuopio University Hospital                                                           | E.Huttunen, R.Ikäheimo, P.Karhapää, P.Kekäläinen, M.Laakso, T.Lakka, E.Lampainen, L.Moilanen, S.Tanskanen, L.Niskanen, U.Tuovinen, I.Vauhkonen, E.Voutilainen                                             |
| Kuusamo Health Center                                                                | T.Kääriäinen, E.Isopoussu                                                                                                                                                                                 |
| Kuusankoski Hospital                                                                 | E.Kilki, I.Koskinen, L.Riihelä                                                                                                                                                                            |
| Laakso Hospital, Helsinki                                                            | T.Meriläinen, P.Poukka, R.Savolainen, N.Uhlenius                                                                                                                                                          |
| Lahti City Hospital                                                                  | A.Mäkelä, M.Tanner                                                                                                                                                                                        |
| Lapland Central Hospital, Rovaniemi                                                  | L.Hyvärinen, K.Lampela, S.Pöykkö, T.Rompasaari, S.Severinkangas, T.Tulokas                                                                                                                                |
| Lappeenranta Health Center                                                           | P.Erola, L.Härkönen, P.Linkola, T.Pekkanen, I.Pulli, E.Repo                                                                                                                                               |
| Lohja Hospital                                                                       | T.Granlund, K.Hietanen, M.Porrassalmi, M.Saari, T.Salonen, M.Tiikkainen,                                                                                                                                  |
| Länsi-Uusimaa Hospital, Tammisaari                                                   | I.-M.Jousmaa, J.Rinne                                                                                                                                                                                     |
| Loimaa Health Center                                                                 | A.Mäkelä, P.Eloranta                                                                                                                                                                                      |
| Malmi Hospital, Helsinki                                                             | H.Lanki, S.Moilanen, M.Tilly-Kiesi                                                                                                                                                                        |
| Mikkeli Central Hospital                                                             | A.Gynther, R.Manninen, P.Nironen, M.Salminen, T.Vänttinen                                                                                                                                                 |
| Mänttä Regional Hospital                                                             | I.Pirttiniemi, A-M.Hänninen                                                                                                                                                                               |
| North Karelian Hospital, Joensuu                                                     | U-M.Henttula, P.Kekäläinen, M.Pietarinen, A.Rissanen, M.Voutilainen                                                                                                                                       |
| Nurmijärvi Health Center                                                             | A.Burgos, K.Urtamo                                                                                                                                                                                        |
| Oulaskangas Hospital, Oulainen                                                       | E.Jokelainen, P-L.Jylkkä, E.Kaarlela, J.Vuolaspuro                                                                                                                                                        |
| Oulu Health Center                                                                   | L.Hiltunen, R.Häkkinen, S.Keinänen-Kiukaanniemi                                                                                                                                                           |
| Oulu University Hospital                                                             | R.Ikäheimo                                                                                                                                                                                                |
| Päijät-Häme Central Hospital                                                         | H.Haapamäki, A.Helanterä, S.Hämäläinen,                                                                                                                                                                   |

|                                              |                                                                          |
|----------------------------------------------|--------------------------------------------------------------------------|
| Palokka Health Center                        | V.Ilvesmäki, H.Miettinen                                                 |
| Pieksämäki Hospital                          | P.Sopanen, L.Welling                                                     |
| Pietarsaari Hospital                         | V.Sevtsenko, M.Tamminen                                                  |
| Pori City Hospital                           | M.-L.Holmbäck, B.Isomaa, L.Sarelin                                       |
| Porvoo Hospital                              | P.Ahonen, P.Merisalo, E.Muurinen, K.Sävelä                               |
| Raahe Hospital                               | M.Kallio, B.Rask, S.Rämö                                                 |
| Rauma Hospital                               | A.Holma, M.Honkala, A.Tuomivaara, R.Vainionpää                           |
| Riihimäki Hospital                           | K.Laine, K.Saarinen, T.Salminen                                          |
| Salo Hospital                                | P.Aalto, E.Immonen, L.Juurinen                                           |
| Satakunta Central Hospital, Pori             | A.Alanko, J.Lapinleimu, P.Rautio, M.Virtanen                             |
|                                              | M.Asola, M.Juhola, P.Kunelius, M.-L.Lahdenmäki,                          |
|                                              | P.Pääkkönen, M.Rautavirta                                                |
| Savonlinna Central Hospital                  | T.Pulli, P.Sallinen, M.Taskinen, E.Tolvanen, T.Tuominen                  |
|                                              | H.Valtonen, A.Vartia, S-L.Viitanen                                       |
| Seinäjoki Central Hospital                   | O.Antila, E.Korpi-Hyövälti, T.Latvala, E.Leijala, T.Leikkari, M.Punkari  |
|                                              | N.Rantamäki, H.Vähävuori                                                 |
| South Karelia Central Hospital, Lappeenranta | T.Ensala, E.Hussi, R.Härkönen, U.Nyholm, J.Toivanen                      |
| Tampere Health Center                        | A.Vaden, P.Alarotu, E.Kujansuu, H.Kirkkopelto-Jokinen,                   |
|                                              | M.Helin, S.Gummerus, L.Caloniuss, T.Niskanen, T.Kaitala,                 |
|                                              | T.Vatanen                                                                |
| Tampere University Hospital                  | P. Hannula, I.Ala-Houhala, R.Kannisto, T.Kuningas, P.Lampinen, M.Määttä, |
|                                              | H.Oksala, T.Oksanen, A.Putila, H.Saha, K.Salonen, H.Tauriainen,          |
|                                              | S.Tulokas                                                                |
| Tiirismaa Health Center, Hollola             | T.Kivelä, L.Petlin, L.Savolainen                                         |
| Turku Health Center                          | A.Artukka, I.Hämäläinen, L.Lehtinen, E.Pyysalo, H.Virtamo, M.Viinikkala, |
| M.Vähätalo                                   |                                                                          |
| Turku University Central Hospital            | K.Breitholz, R.Eskola, K.Metsärinne, U.Pietilä,                          |
|                                              | P.Saarinen, R.Tuominen, S.Äyräpää                                        |
| Vaajakoski Health Center                     | K.Mäkinen, P.Sopanen                                                     |
| Valkeakoski Regional Hospital                | S.Ojanen, E.Valtonen, H.Ylönen, M.Rautiainen,                            |
|                                              | T.Immonen                                                                |
| Vammala Regional Hospital                    | I.Isomäki, R.Kroneld, L.Mustaniemi, M.Tapiolinna-Mäkelä                  |
| Vasa Central Hospital                        | S.Bergkulla, U.Hautamäki, V-A.Myllyniemi, I.Rusk                         |
